# Supplementary material
Source: publisher site journal article supplement (https://www.dovepress.com/article/506819)
Supplement: Supplementary file 1 [file get_supplementary_file.php]

**Table S1.** Response for Knowledge Dimension

| **Items, n (%)** | **Well-known** | **Heard of** | **Unclear** |
| --- | --- | --- | --- |
| **1.** **Swallowing disorders are characterized by difficulties in the passage of food or liquids during the act of swallowing due to impairment in the lower jaw, lips, tongue, soft palate, pharynx, esophageal sphincter, or esophageal function.** | 168(46.03) | 185(50.68) | 12(3.29) |
| **2.** **Swallowing disorders are a common clinical symptom, and various conditions can lead to swallowing difficulties, including central nervous system diseases, peripheral neuropathies, neuromuscular junction disorders, muscular conditions, structural abnormalities in the oropharynx, diseases of the digestive and respiratory systems, and postoperative or post-radiation therapy in patients with oropharyngeal problems.** | 173(47.4) | 183(50.14) | 9(2.47) |
| **3.** **Common clinical manifestations of swallowing disorders include drooling or food spilling from the mouth, holding food in the mouth without swallowing for extended periods, food or liquid regurgitating through the nose (nasal regurgitation), food sticking in the mouth or throat, coughing or choking while eating or drinking, altered eating habits, an inability to swallow certain foods, the need for extra liquids to moisten food or assist in swallowing, a hoarse or muffled voice, frequent oral clearing, difficulty or pain while chewing, recurrent pneumonia, unexplained fever, and weight loss.** | 173(47.4) | 184(50.41) | 8(2.19) |
| **4. Common complications of swallowing disorders include aspiration, pneumonia, malnutrition, as well as psychological and social interaction issues, which increase the mortality and worsen the prognosis for affected individuals.** | 204(55.89) | 152(41.64) | 9(2.47) |
| **5.** **Routine screening for swallowing disorders should be considered in some common diseases and specific populations such as stroke patients, tracheostomized patients, and frail elderly individuals.** | 168(46.03) | 182(49.86) | 15(4.11) |
| **6.** **Various screening methods for swallowing disorders, including the repetitive saliva-swallowing test, the water swallow test, the modified water swallow test, an eating assessment questionnaire survey, and the Toronto Bedside Swallowing Screening Test, can be employed.** | 129(35.34) | 195(53.42) | 41(11.23) |
| **7.** **Nutrition is a primary concern for individuals with swallowing disorders. If there are no contraindications, enteral nutrition is recommended. In cases where enteral nutrition is not feasible or contraindicated, options for partial or full parenteral nutrition may be considered.** | 167(45.75) | 180(49.32) | 18(4.93) |
| **8.** **Compensatory methods involving adjustments in swallowing postures are crucial for swallowing rehabilitation and should be tailored precisely to each patient's needs. Factors such as reduced or excessive saliva production diminished oral self-cleaning ability, food residue retention, and ineffective clearance of colonizing microbes are all relevant to the risk of aspiration-related pneumonia and should be addressed with effective measures to ensure oral hygiene.** | 126(34.52) | 203(55.62) | 36(9.86) |
| **9.** **For patients who can partially ingest orally, using gels to encapsulate medications and ensuring safe ingestion can be a suitable choice to ensure both therapeutic efficacy and safety during meals.** | 128(35.07) | 193(52.88) | 44(12.05) |

**Table S2.** Response for Attitude Dimension

| **Items, n (%)** | **Strongly Agree** | **Agree** | **Neutral** | **Disagree** | **Strongly Disagree** |
| --- | --- | --- | --- | --- | --- |
| **1.** **Swallowing disorders may impact the quality of life for patients, and it is essential to actively seek treatment options to aid in the patients' swift recovery. P** | 240(65.75) | 115(31.51) | 8(2.19) | 1(0.27) | 1(0.27) |
| **2.** **Swallowing disorders should be assessed more by nurses rather than physicians. N** | 69(18.9) | 115(31.51) | 76(20.82) | 94(25.75) | 11(3.01) |
| **3.** **Some swallowing disorders can be preventable, and greater attention should be given to patients in this regard. P** | 182(49.86) | 167(45.75) | 14(3.84) | 1(0.27) | 1(0.27) |
| **4.** **Nutritional management should involve the participation of Professional title dietitians, but the current situation often falls short of meeting these requirements. N** | 144(39.45) | 194(53.15) | 22(6.03) | 3(0.82) | 2(0.55) |
| **5.** **I am willing to proactively learn and stay updated on new knowledge and technologies related to the diagnosis and treatment of swallowing disorders. P** | 180(49.32) | 150(41.1) | 31(8.49) | 2(0.55) | 2(0.55) |
| **6.** **I believe that it is crucial to actively promote awareness of preventive knowledge and health education for patients at risk of swallowing disorders. P** | 196(53.7) | 151(41.37) | 16(4.38) | 1(0.27) | 1(0.27) |

**Table S3.** Response for Practice Dimension

| **Items, n (%)** | **Always** | **Often** | **Sometimes** | **Rarely** | **Never** |
| --- | --- | --- | --- | --- | --- |
| **1.** **Screening for high-risk individuals** | 47(12.88) | 126(34.52) | 111(30.41) | 64(17.53) | 17(4.66) |
| **2.** **Conducting clinical swallowing assessments for all confirmed or suspected swallowing disorder patients** | 66(18.08) | 116(31.78) | 102(27.95) | 68(18.63) | 13(3.56) |
| **3.** **Inquiring about medical history, medication usage, dietary preferences, and related information to gain a comprehensive understanding of the patient's history** | 96(26.3) | 137(37.53) | 93(25.48) | 30(8.22) | 9(2.47) |
| **4.** **Conducting volume-viscosity swallow tests (V-VST) as part of bedside eating assessments for all patients** | 41(11.23) | 76(20.82) | 80(21.92) | 100(27.4) | 68(18.63) |
| **5.** **Directly assessing the swallowing ability of patients capable of oral intake** | 54(14.79) | 90(24.66) | 97(26.58) | 92(25.21) | 32(8.77) |
| **6.** **Recommending patients for swallowing fluoroscopy and flexible endoscopic evaluation of swallowing (FEES)** | 46(12.6) | 75(20.55) | 92(25.21) | 105(28.77) | 47(12.88) |
| **7.** **Providing nutritional management for patients** | 78(21.37) | 118(32.33) | 91(24.93) | 65(17.81) | 13(3.56) |
| **8.** **Administering treatments to enhance swallowing function for patients** | 61(16.71) | 103(28.22) | 95(26.03) | 79(21.64) | 27(7.4) |
| **9.** **Recommending the use of compensatory methods for patients** | 46(12.6) | 112(30.68) | 108(29.59) | 77(21.1) | 22(6.03) |
| **10.** **Offering rehabilitation nursing guidance for patients** | 68(18.63) | 123(33.7) | 105(28.77) | 57(15.62) | 12(3.29) |
